# Supplementary material for: Students’ Performance in Face-to-Face, Online, and Hybrid Methods of Teaching and Assessment in Anatomy
Source: MDPI journal article supplement (doi:10.3390/ijerph192013318), 2022-10-15
Supplement: s1 [file s1]

Supplementary Table S1: Gender distribution of students included in the study over the three semesters.

| <b>MD program</b> | Spring 2019 | Spring 2020 | Spring 2021 |
|-------------------|-------------|-------------|-------------|
| Male students     | 79          | 81          | 64          |
| Female students   | 91          | 85          | 65          |
| Total number      | 170         | 166         | 129         |

| <b>BMS program</b> | Spring 2019 | Spring 2020 | Spring 2021 |
|--------------------|-------------|-------------|-------------|
| Male students      | 14          | 14          | 14          |
| Female students    | 19          | 13          | 14          |
| Total number       | 33          | 27          | 28          |
